# Supplementary material for: Cd59 and inflammation regulate Schwann cell development
Source: eLife journal article supplement (doi:10.7554/elife.76640), 2022-06-06
Supplement: fig3-figsupp1-data1 [file elife-76640-fig3-figsupp1-data1-v1.pdf]

Source Data for Figure 3 - Figure Supplement 1A

Unlabeled, Uncropped Gel

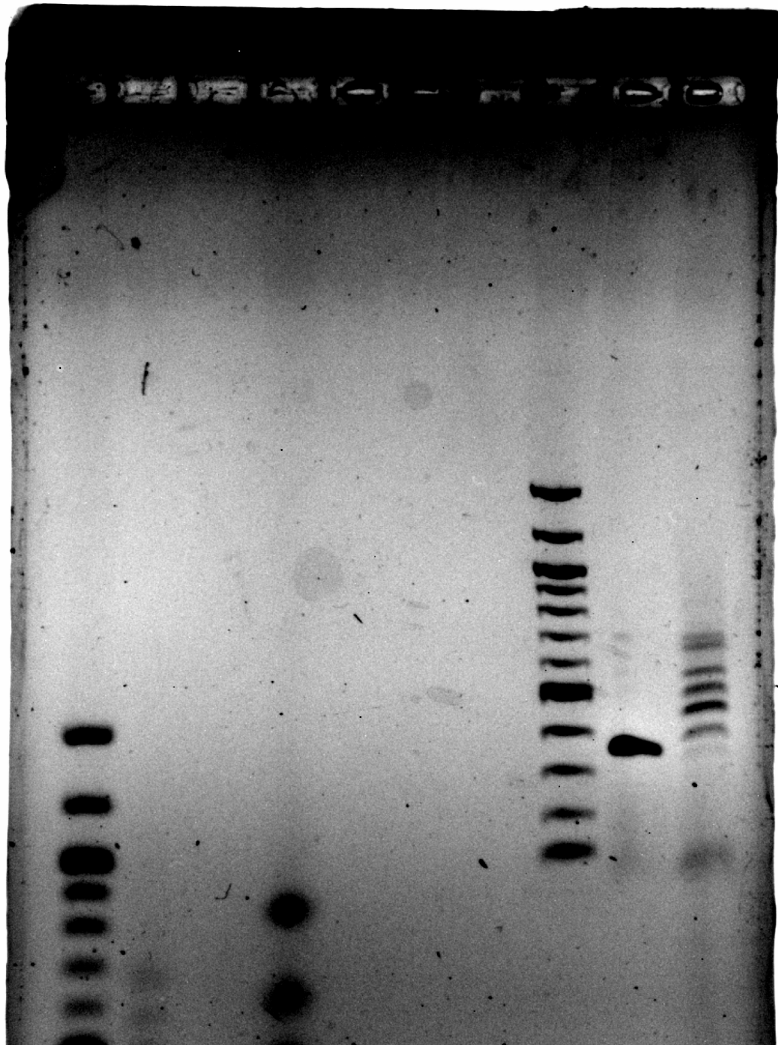

Labeled, Uncropped Gel

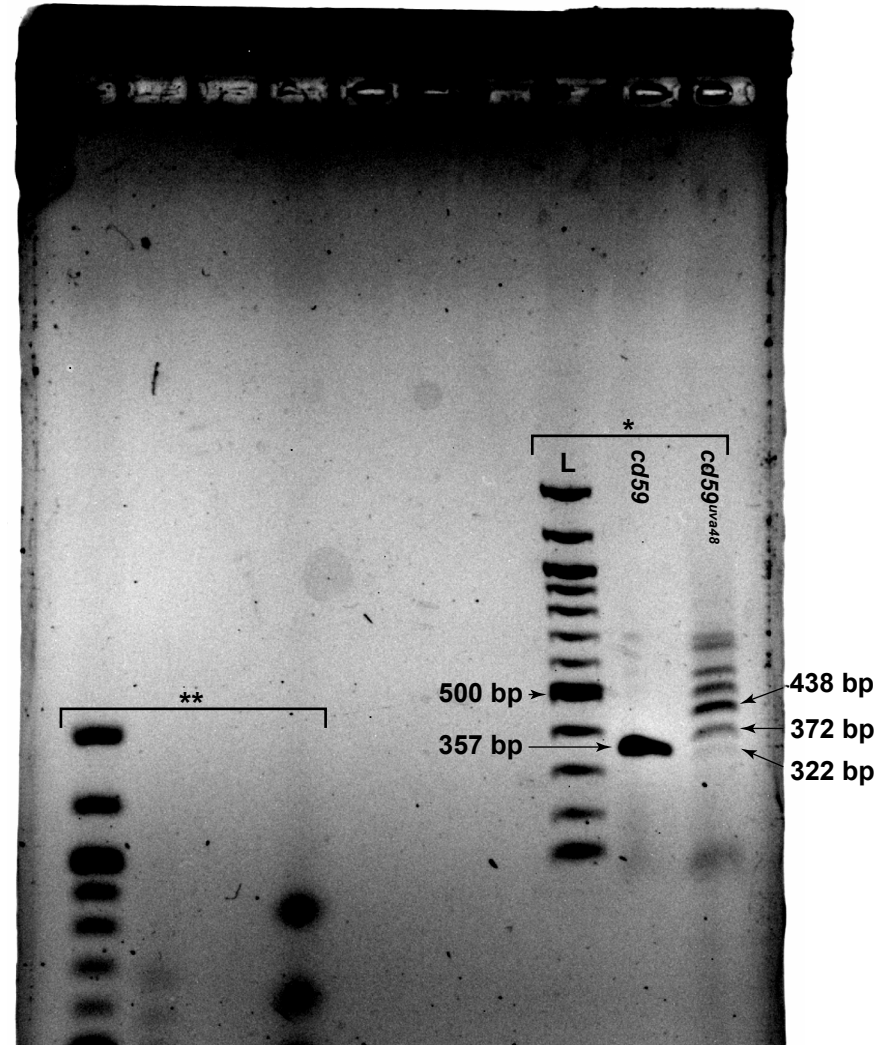

\*Data represented in final figure.

\*\*Bands leftover from a different experiment.
