# Supplementary material for: Cd59 and inflammation regulate Schwann cell development
Source: eLife journal article supplement (doi:10.7554/elife.76640), 2022-06-06
Supplement: fig3-figsupp1-data2 [file elife-76640-fig3-figsupp1-data2-v1.pdf]

Source Data for Figure 3 - Figure Supplement 1B

Unlabeled, Uncropped Gel

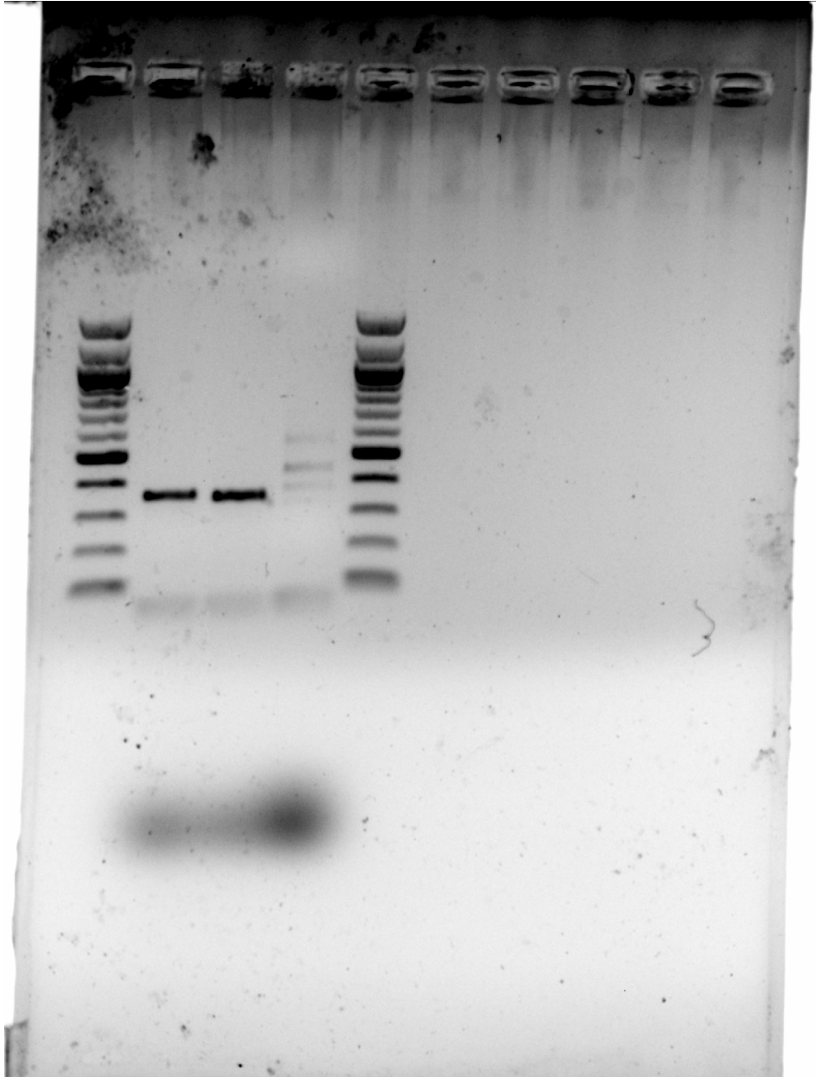

Labeled, Uncropped Gel

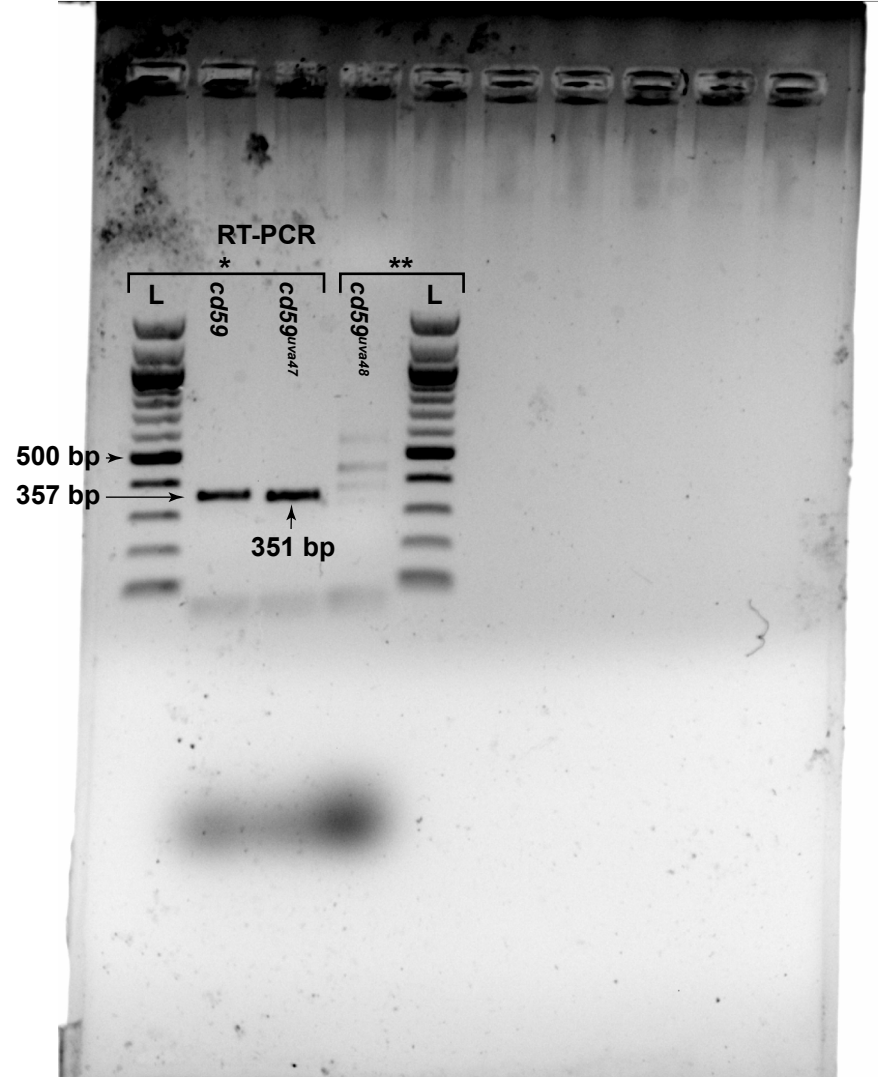

\*Data represented in final figure.

\*\*For author's reference at the time of experiment.  
Not included in final figure.
