# Supplementary material for: Cd59 and inflammation regulate Schwann cell development
Source: eLife. 2022 Jun 24;11:e76640. doi: 10.7554/eLife.76640 (PMC9232220; doi:10.7554/eLife.76640)
Supplement: Figure 1—source data 1. — Data contributed to scatter plot of cd59 expression (TPM) in oligodendrocyte lineage cells (OLCs), Schwann cells (SCs), and neurons (N) at 72 hours post fertilization (hpf) (left; mean ± SEM: OLC: 2145.1 ± 1215.1, SC: 40.1 ± 16.3; N: 240.5 ± 173.3; data point = replicate) as well as SCs at 36 and 72 hpf (right; mean ± SEM: 36 hpf: 0.0 ± 0.0, 72 hpf: 40.2 ± 16.3; data point = replicate). [file elife-76640-fig1-data1.xlsx]

## Sheet: Sheet1
Source Data for Figure 1C, left				Source Data for Figure 1C, right
cd59 (TPM) (72 hpf)				cd59 (TPM) (SCs only)
OLC	SC	N		36 hpf	72 hpf
1958.81	52.4007	103.73		0	52.4007
139.895	60.2948	584.67		0	60.2948
4336.68	8.02251	32.9808		0	8.02251
OLC	oligodendrocyte lineage cells
SC	Schwann cells
N	neurons
cd59	cluster of differentiation 59
TPM	transcripts per million
hpf	hours post fertilization
Source RNAseq datasets
Figure 1C, left	Piller et al., 2021
Figure 1C, right	Zhu et al., 2019
