# Supplementary material for: Cd59 and inflammation regulate Schwann cell development
Source: eLife. 2022 Jun 24;11:e76640. doi: 10.7554/eLife.76640 (PMC9232220; doi:10.7554/eLife.76640)
Supplement: Figure 2—source data 1. — Data contributed to scatter plot of percent cd59:tagrfp-positive Schwann cells (SCs) on the posterior lateral line nerve (pLLN) from 3 to 7 days post fertilization (dpf) (mean ± SEM: 3 dpf: 9.4 ± 1.5; 4 dpf: 10.0 ± 1.0; 5 dpf: 7.8 ± 1.2; 6 dpf: 4.4 ± 0.6; 7 dpf: 5.8 ± 0.6; p-values: 3 vs. 6 dpf: p=0.0126, 4 vs. 6 dpf: p=0.0095, 4 vs. 7 dpf: p=0.0477; data point = 1 fish). These data were compared with a one-way ANOVA with Tukey’s post-hoc test using GraphPad Prism. Data collected from somites 11–13 (~320 μm) and normalized to units per 100 μm. [file elife-76640-fig2-data1.xlsx]

## Sheet: Sheet1
Source Data for Figure 2F
		Number of cd59:tagrfp-positive SCs						Total Number of SCs						Percent cd59:tagrfp-positive SCs						Percent cd59:tagrfp-positive SCs per 100 µm
Fish		3 dpf	4 dpf	5 dpf	6 dpf	7 dpf		3 dpf	4 dpf	5 dpf	6 dpf	7 dpf		3 dpf	4 dpf	5 dpf	6 dpf	7 dpf		3 dpf	4 dpf	5 dpf	6 dpf	7 dpf
1		10	19	6	11	5		54	59	41	59	51		18.5	32.2034	14.6	18	9.8		5.55	9.66102	4.38	5.4	2.94
2		13	16	12	7	14		30	40	56	64	63		43.3333	40	21.4	10.9	22.2		13	12	6.42	3.27	6.66
3		13	9	11	6	9		36	37	62	62	58		36.1111	24.3243	17.7	9.68	15.5		10.8333	7.2973	5.31	2.904	4.65
4		18	14	9	7	13		35	34	61	56	72		51.4286	41.1765	14.75	12.5	18.1		15.4286	12.3529	4.425	3.75	5.43
5		6	10	12	14	12		28	34	44	61	68		21.4286	29.4118	27.2727	22.95	17.65		6.42857	8.82353	8.18182	6.885	5.295
6		12		23	6	10		42		58	57	53		28.5714		39.6552	10.7	18.87		8.57143		11.8966	3.21	5.661
7		7		8	11	11		36		43	60	70		19.4444		18.6046	18.33	15.7		5.83333		5.58139	5.499	4.71
8				18		18				54		60				33.3333		30				10		9
9				21		12				45		77				46.6667		15.58				14		4.674
10						12						56						21.4						6.42
11						18						64						28.12						8.436
Notes
SC	Schwann cell
dpf	days post fertilization
