# Supplementary material for: Cd59 and inflammation regulate Schwann cell development
Source: eLife. 2022 Jun 24;11:e76640. doi: 10.7554/eLife.76640 (PMC9232220; doi:10.7554/eLife.76640)
Supplement: Figure 3—source data 1. — Data contributed to scatter plot of the number of cd59 RNA puncta in posterior lateral line nerve (pLLN) SCs (mean ± SEM: WT: 64.7 ± 7.6, cd59uva48: 14 ± 1.7; p<0.0001; data point = 1 cell; n = 7 fish per group). These data were compared with Student’s t-test using GraphPad Prism. [file elife-76640-fig3-data1.xlsx]

## Sheet: Sheet1
Source Data for Figure 3J
Cell	Genotype	Number of cd59 Puncta
1	wildtype	48		Notes:	*data collected from 7 fish per group
2	wildtype	59
3	wildtype	30
4	wildtype	72
5	wildtype	62
6	wildtype	13
7	wildtype	34
8	wildtype	28
9	wildtype	50
10	wildtype	64
11	wildtype	101
12	wildtype	118
13	wildtype	100
14	wildtype	51
15	wildtype	119
16	wildtype	78
17	wildtype	72
1	cd59uva48 mutant	29
2	cd59uva48 mutant	25
3	cd59uva48 mutant	18
4	cd59uva48 mutant	18
5	cd59uva48 mutant	13
6	cd59uva48 mutant	11
7	cd59uva48 mutant	8
8	cd59uva48 mutant	12
9	cd59uva48 mutant	27
10	cd59uva48 mutant	4
11	cd59uva48 mutant	19
12	cd59uva48 mutant	6
13	cd59uva48 mutant	15
14	cd59uva48 mutant	13
15	cd59uva48 mutant	7
16	cd59uva48 mutant	9
17	cd59uva48 mutant	10
18	cd59uva48 mutant	3
19	cd59uva48 mutant	19
