# Supplementary material for: Cd59 and inflammation regulate Schwann cell development
Source: eLife. 2022 Jun 24;11:e76640. doi: 10.7554/eLife.76640 (PMC9232220; doi:10.7554/eLife.76640)
Supplement: Figure 4—figure supplement 1—source data 1. — Data contributed to scatter plot of the number of Sox10-positive SCs along the pLLN at 48 hpf (mean ± SEM: WT: 5.7 ± 0.3, cd59uva48: 8.3 ± 0.5; p=0.0003; data point = 1 fish). These data were compared with Student’s t-test using GraphPad Prism. Data were collected from somites 11–13 (~320 µm) and normalized to units per 100 µm. [file elife-76640-fig4-figsupp1-data1.xlsx]

## Sheet: Sheet1
Source Data for Figure 4 - Figure Supplement 1B
Fish	Genotype	Total Number of SCs	Number of SCs per 100 µm		Notes
1	wt	24	7.5		wt	wildtype
2	wt	22	6.875		mt	cd59uva48 mutant
3	wt	21	6.5625		SC	Schwann cell
4	wt	17	5.3125
5	wt	8	2.5
6	wt	19	5.9375
7	wt	21	6.5625
8	wt	18	5.625
9	wt	19	5.9375
10	wt	14	4.375
11	wt	20	6.25
12	wt	15	4.6875
13	wt	17	5.3125
14	wt	20	6.25
1	mt	25	7.8125
2	mt	27	8.4375
3	mt	28	8.75
4	mt	34	10.625
5	mt	31	9.6875
6	mt	14	4.375
7	mt	31	9.6875
8	mt	27	8.4375
9	mt	28	8.75
10	mt	28	8.75
11	mt	18	5.625
