# Supplementary material for: Cd59 and inflammation regulate Schwann cell development
Source: eLife. 2022 Jun 24;11:e76640. doi: 10.7554/eLife.76640 (PMC9232220; doi:10.7554/eLife.76640)
Supplement: Figure 4—figure supplement 1—source data 2. — Data contributed to scatter plot of the number of HuC/HuD-positive neurons in the pLLG at 24 hpf (mean ± SEM: WT: 20.9 ± 1.0, cd59uva48: 20.3 ± 1.1; data point = 1 fish). These data were compared with Student’s t-test using GraphPad Prism. [file elife-76640-fig4-figsupp1-data2.xlsx]

## Sheet: Sheet1
Source Data for Figure 4 - Figure Supplement 1E
Fish	Genotype	Number of pLLG Neurons		Notes
1	wildtype	24		pLLG	posterior lateral line ganglion
2	wildtype	16
3	wildtype	18
4	wildtype	22
5	wildtype	25
6	wildtype	21
7	wildtype	28
8	wildtype	23
9	wildtype	22
10	wildtype	24
11	wildtype	18
12	wildtype	15
13	wildtype	19
14	wildtype	18
1	cd59uva48 mutant	20
2	cd59uva48 mutant	14
3	cd59uva48 mutant	23
4	cd59uva48 mutant	22
5	cd59uva48 mutant	19
6	cd59uva48 mutant	22
7	cd59uva48 mutant	30
8	cd59uva48 mutant	18
9	cd59uva48 mutant	15
10	cd59uva48 mutant	24
11	cd59uva48 mutant	17
12	cd59uva48 mutant	18
13	cd59uva48 mutant	21
14	cd59uva48 mutant	21
