# Supplementary material for: Cd59 and inflammation regulate Schwann cell development
Source: eLife. 2022 Jun 24;11:e76640. doi: 10.7554/eLife.76640 (PMC9232220; doi:10.7554/eLife.76640)
Supplement: Figure 4—figure supplement 1—source data 3. — Data contributed to scatter plot of the number of Sox10-positive NCCs in the pLLG at 24 hpf (mean ± SEM: WT: 49.2 ± 2.1, cd59uva48: 50.8 ± 1.4; data point = 1 fish). These data were compared with Student’s t-test using GraphPad Prism. [file elife-76640-fig4-figsupp1-data3.xlsx]

## Sheet: Sheet1
Source Data for Figure 4 - Figure Supplement 1F
Fish	Genotype	Number of pLLG-associated NCCs		Notes
1	wildtype	40		pLLG	posterior lateral line ganglion
2	wildtype	56		NCC	neural crest cell
3	wildtype	53
4	wildtype	53
5	wildtype	56
6	wildtype	57
7	wildtype	58
8	wildtype	40
9	wildtype	39
10	wildtype	39
11	wildtype	49
12	wildtype	44
13	wildtype	55
1	cd59uva48 mutant	46
2	cd59uva48 mutant	45
3	cd59uva48 mutant	54
4	cd59uva48 mutant	57
5	cd59uva48 mutant	49
6	cd59uva48 mutant	56
7	cd59uva48 mutant	57
8	cd59uva48 mutant	55
9	cd59uva48 mutant	41
10	cd59uva48 mutant	55
11	cd59uva48 mutant	46
12	cd59uva48 mutant	51
13	cd59uva48 mutant	45
14	cd59uva48 mutant	54
