# Supplementary material for: Cd59 and inflammation regulate Schwann cell development
Source: eLife. 2022 Jun 24;11:e76640. doi: 10.7554/eLife.76640 (PMC9232220; doi:10.7554/eLife.76640)
Supplement: Figure 4—figure supplement 1—source data 4. — Data contributed to scatter plot of the number of Sox10-positive, migrating NCCs in the trunk at 24 hpf (mean ± SEM: WT: 7.1 ± 0.4, cd59uva48: 7.3 ± 0.4; data point = 1 fish). These data were compared with Student’s t-test using GraphPad Prism. [file elife-76640-fig4-figsupp1-data4.xlsx]

## Sheet: Sheet1
Source Data for Figure 4 - Figure Supplement 1H
Fish	Genotype	Number of Migrating NCCs per Stream		Notes
1	wt	11		wt	wildtype
2	wt	7		mt	cd59uva48 mutant
3	wt	5		NCC	neural crest cell
4	wt	8
5	wt	8
6	wt	7
7	wt	7
8	wt	6
9	wt	6
10	wt	5
11	wt	9
12	wt	7
13	wt	5
14	wt	9
15	wt	8
16	wt	6
17	wt	6
1	mt	7
2	mt	8
3	mt	8
4	mt	7
5	mt	6
6	mt	7
7	mt	6
8	mt	6
9	mt	8
10	mt	7
11	mt	7
12	mt	11
