# Supplementary material for: Cd59 and inflammation regulate Schwann cell development
Source: eLife. 2022 Jun 24;11:e76640. doi: 10.7554/eLife.76640 (PMC9232220; doi:10.7554/eLife.76640)
Supplement: Figure 4—figure supplement 1—source data 5. — Data contributed to scatter plot of the number of Sox10-positive cell per spinal motor nerves at 72 hpf (mean ± SEM: WT: 6.3 ± 0.4, cd59uva48: 6.4 ± 0.36; dot = 1 fish). These data were compared with Student’s t-test using GraphPad Prism. [file elife-76640-fig4-figsupp1-data5.xlsx]

## Sheet: antibody
Source Data for Figure 4 - Figure Supplement 1J
Fish	Genotype	Total number of Sox10+ cells per nerve			Notes
1	wt	9			wt	wildtype
2	wt	5			mt	cd59uva48 mutant
3	wt	7			Sox10+ cell	Schwann cell or Motor Exit Point glial cell
4	wt	3
5	wt	6
6	wt	4
7	wt	6
8	wt	6
9	wt	4
10	wt	6
11	wt	6
12	wt	7
13	wt	7
14	wt	5
15	wt	9
16	wt	9
17	wt	4
18	wt	7
19	wt	8
20	wt	8
1	mt	6
2	mt	9
3	mt	7
4	mt	6
5	mt	4
6	mt	6
7	mt	6
8	mt	8
9	mt	6
10	mt	5
11	mt	5
12	mt	7
13	mt	8
14	mt	7
