# Supplementary material for: Cd59 and inflammation regulate Schwann cell development
Source: eLife. 2022 Jun 24;11:e76640. doi: 10.7554/eLife.76640 (PMC9232220; doi:10.7554/eLife.76640)
Supplement: Figure 4—figure supplement 1—source data 6. — Data contributed to scatter plot of the number of Tubulin-positive neuromasts in the trunk at 7 dpf (mean ± SEM: WT: 7.4 ± 0.3, cd59uva48: 6.8 ± 0.3; data point = 1 fish). These data were compared with Student’s t-test using GraphPad Prism. [file elife-76640-fig4-figsupp1-data6.xlsx]

## Sheet: Sheet1
Source Data for Figure 4 - Figure Supplement 1K
Fish	Genotype	Number of Trunk Neuromasts
1	wildtype	9
2	wildtype	8
3	wildtype	7
4	wildtype	6
5	wildtype	7
6	wildtype	8
7	wildtype	7
8	wildtype	7
9	wildtype	8
1	cd59uva48 mutant	7
2	cd59uva48 mutant	7
3	cd59uva48 mutant	9
4	cd59uva48 mutant	5
5	cd59uva48 mutant	5
6	cd59uva48 mutant	7
7	cd59uva48 mutant	7
8	cd59uva48 mutant	7
9	cd59uva48 mutant	7
10	cd59uva48 mutant	7
11	cd59uva48 mutant	8
12	cd59uva48 mutant	7
13	cd59uva48 mutant	8
14	cd59uva48 mutant	8
15	cd59uva48 mutant	5
16	cd59uva48 mutant	5
17	cd59uva48 mutant	7
