# Supplementary material for: Cd59 and inflammation regulate Schwann cell development
Source: eLife. 2022 Jun 24;11:e76640. doi: 10.7554/eLife.76640 (PMC9232220; doi:10.7554/eLife.76640)
Supplement: Figure 4—figure supplement 2—source data 1. — Data contributed to scatter plot of the number of AO-positive SCs along the posterior lateral line nerve (pLLN) at 48 hpf (mean ± SEM: WT: 0.06 ± 0.04, cd59uva48: 0.03 ± 0.03; data point = 1 fish). These data were compared with Student’s t-test using GraphPad Prism. Data were collected from somites 11–13 (~320 µm) and normalized to units per 100 µm. [file elife-76640-fig4-figsupp2-data1.xlsx]

## Sheet: 48hpf
Source Data for Figure 4 - Figure Supplement 2B
Fish	Genotype	Number of AO+ SCs	Number of AO+ SCs per 100 µm		Notes
1	wt	0	0		wt	wildtype
2	wt	1	0.3125		mt	cd59uva48 mutant
3	wt	0	0		AO	acridine orange
4	wt	0	0		SC	Schwann cell
5	wt	0	0
6	wt	0	0
7	wt	0	0
8	wt	0	0
9	wt	0	0
10	wt	0	0
11	wt	0	0
12	wt	0	0
13	wt	0	0
14	wt	0	0
15	wt	0	0
16	wt	2	0.625
17	wt	0	0
18	wt	1	0.3125
19	wt	0	0
20	wt	0	0
1	mt	0	0
2	mt	0	0
3	mt	0	0
4	mt	0	0
5	mt	1	0.3125
6	mt	0	0
7	mt	0	0
8	mt	0	0
9	mt	0	0
10	mt	0	0
11	mt	0	0
12	mt	0	0
