# Supplementary material for: Cd59 and inflammation regulate Schwann cell development
Source: eLife. 2022 Jun 24;11:e76640. doi: 10.7554/eLife.76640 (PMC9232220; doi:10.7554/eLife.76640)
Supplement: Figure 4—figure supplement 2—source data 2. — Data contributed to scatter plot of the number of AO-positive cells ventral to the pLLN at 48 hpf (mean ± SEM: WT: 2.2 ± 0.2, cd59uva48: 2.8 ± 0.3; dot = 1 fish). These data were compared with Student’s t-test using GraphPad Prism. Data were collected from somites 11–13 (~320 µm) and normalized to units per 100 µm. [file elife-76640-fig4-figsupp2-data2.xlsx]

## Sheet: Sheet1
Source Data for Figure 4 - Figure Supplement 2C
Fish	Genotype	Number of AO+ Cells Ventral to pLLN	Number of AO+ Cells Ventral to pLLN per 100 µm		Notes
1	wt	9	2.8125		wt	wildtype
2	wt	5	1.5625		mt	cd59uva48 mutant
3	wt	6	1.875		AO	acridine orange
4	wt	5	1.5625		pLLN	posterior lateral line nerve
5	wt	7	2.1875
6	wt	5	1.5625
7	wt	3	0.9375
8	wt	12	3.75
9	wt	1	0.3125
10	wt	9	2.8125
11	wt	5	1.5625
12	wt	6	1.875
13	wt	10	3.125
14	wt	5	1.5625
15	wt	4	1.25
16	wt	12	3.75
17	wt	15	4.6875
18	wt	10	3.125
19	wt	6	1.875
20	wt	8	2.5
1	mt	9	2.8125
2	mt	4	1.25
3	mt	9	2.8125
4	mt	9	2.8125
5	mt	8	2.5
6	mt	7	2.1875
7	mt	8	2.5
8	mt	6	1.875
9	mt	14	4.375
10	mt	6	1.875
11	mt	14	4.375
12	mt	12	3.75
