# Supplementary material for: Cd59 and inflammation regulate Schwann cell development
Source: eLife. 2022 Jun 24;11:e76640. doi: 10.7554/eLife.76640 (PMC9232220; doi:10.7554/eLife.76640)
Supplement: Figure 4—figure supplement 2—source data 4. — Data contributed to scatter plot of the number of TUNEL-positive cells in the spinal cord at 48 hpf (mean ± SEM: WT: 0.4 ± 0.2, cd59uva48: 0.6 ± 0.3; data point = 1 fish). These data were compared with Student’s t-test using GraphPad Prism. Data were collected from 10 consecutive transverse sections per fish (~200 µm) and normalized to units per 100 µm. [file elife-76640-fig4-figsupp2-data4.xlsx]

## Sheet: Sheet1
Source Data for Figure 4 - Figure Supplement 2F
		Number of TUNEL+ CNS Cells
Fish	Genotype	Section 1	Section 2	Section 3	Section 4	Section 5	Section 6	Section 7	Section 8	Section 9	Section 10	Total # of TUNEL+ CNS Cells	Number of TUNEL+ CNS Cells per 100 µm
1	wt	0	0	0	0	0	0	1	0	0	0	1	0.5
2	wt	2	0	0	0	0	0	0	0	0	0	2	1
3	wt	0	0	0	0	0	0	0	0	0	2	2	1
4	wt	0	0	0	0	0	0	0	0	0	0	0	0
5	wt	0	0	0	0	0	0	0	0	0	0	0	0
6	wt	1	0	0	0	0	0	0	0	0	0	1	0.5
7	wt	0	0	0	0	0	0	0	0	0	0	0	0
8	wt	0	0	0	0	0	0	0	0	0	0	0	0
1	mt	0	0	0	0	0	0	0	1	0	0	1	0.5
2	mt	0	0	0	0	0	0	0	2	0	0	2	1
3	mt	0	0	0	0	0	0	1	0	0	0	1	0.5
4	mt	0	0	0	0	0	0	0	0	0	0	0	0
5	mt	0	0	0	0	0	0	0	0	0	0	0	0
6	mt	0	0	0	0	0	0	1	0	0	0	1	0.5
7	mt	0	0	2	0	0	2	0	0	0	0	4	2
Notes
wt	wildtype
mt	cd59uva48 mutant
CNS	central nervous system (spinal cord)
