# Supplementary material for: Cd59 and inflammation regulate Schwann cell development
Source: eLife. 2022 Jun 24;11:e76640. doi: 10.7554/eLife.76640 (PMC9232220; doi:10.7554/eLife.76640)
Supplement: Figure 4—source data 1. — Data contributed to scatter plot of the number of Sox10-positive SCs along the pLLN at 36 hpf (mean ± SEM: WT: 5.6 ± 0.2, cd59uva48: 9.1 ± 0.3; p-value: p<0.0001; data point = 1 fish). These data were compared with Student’s t-test using GraphPad Prism. Data were collected from somites 11–13 (~320 µm) and normalized to units per 100 µm. [file elife-76640-fig4-data1.xlsx]

## Sheet: Sheet1
Source Data for Figure 4B
Fish	Genotype	Total Number of SCs	Number of SCs per 100 µm		Notes
1	wt	18	5.625		wt	wildtype
2	wt	19	5.9375		mt	cd59uva48 mutant
3	wt	19	5.9375		SC	Schwann cell
4	wt	21	6.5625
5	wt	16	5
6	wt	20	6.25
7	wt	14	4.375
8	wt	17	5.3125
9	wt	20	6.25
10	wt	19	5.9375
11	wt	22	6.875
12	wt	13	4.0625
13	wt	15	4.6875
1	mt	34	10.625
2	mt	33	10.3125
3	mt	27	8.4375
4	mt	33	10.3125
5	mt	30	9.375
6	mt	29	9.0625
7	mt	24	7.5
8	mt	31	9.6875
9	mt	31	9.6875
10	mt	26	8.125
11	mt	26	8.125
12	mt	23	7.1875
13	mt	32	10
14	mt	30	9.375
