# Supplementary material for: Cd59 and inflammation regulate Schwann cell development
Source: eLife. 2022 Jun 24;11:e76640. doi: 10.7554/eLife.76640 (PMC9232220; doi:10.7554/eLife.76640)
Supplement: Figure 4—source data 2. — Data contributed to scatter plot of the number of Sox10-positive SCs along the pLLN at 48 hpf (mean ± SEM: WT: 8.6 ± 0.5, cd59uva48: 15.0 ± 0.7; p-value: p<0.0001; data point = 1 fish). These data were compared with Student’s t-test using GraphPad Prism. Data were collected from somites 11–13 (~320 µm) and normalized to units per 100 µm. [file elife-76640-fig4-data2.xlsx]

## Sheet: Sheet1
Source Data for Figure 4C
Fish	Genotype	Total Number of SCs	Number of SCs per 100 µm		Notes
1	wt	24	7.5		wt	wildtype
2	wt	17	5.3125		mt	cd59uva48 mutant
3	wt	22	6.875		SC	Schwann cell
4	wt	36	11.25
5	wt	33	10.3125
6	wt	32	10
7	wt	30	9.375
8	wt	34	10.625
9	wt	29	9.0625
10	wt	20	6.25
11	wt	32	10
12	wt	33	10.3125
13	wt	27	8.4375
14	wt	24	7.5
15	wt	18	5.625
1	mt	48	15
2	mt	38	11.875
3	mt	57	17.8125
4	mt	31	9.6875
5	mt	43	13.4375
6	mt	45	14.0625
7	mt	61	19.0625
8	mt	52	16.25
9	mt	52	16.25
10	mt	47	14.6875
11	mt	43	13.4375
12	mt	51	15.9375
13	mt	54	16.875
