# Supplementary material for: Cd59 and inflammation regulate Schwann cell development
Source: eLife. 2022 Jun 24;11:e76640. doi: 10.7554/eLife.76640 (PMC9232220; doi:10.7554/eLife.76640)
Supplement: Figure 4—source data 3. — Data contributed to scatter plot of the number of Sox10-positive SCs along the pLLN at 72 hpf (mean ± SEM: WT: 18.0 ± 0.4, cd59uva48: 24.3 ± 0.8; p-value: p<0.0001; data point = 1 fish). These data were compared with Student’s t-test using GraphPad Prism. Data were collected from somites 11–13 (~320 µm) and normalized to units per 100 µm. [file elife-76640-fig4-data3.xlsx]

## Sheet: Sheet1
Source Data for Figure 4D
Fish	Genotype	Total Number of SCs	Number of SCs per 100 µm		Notes
1	wt	59	18.4375		wt	wildtype
2	wt	54	16.875		mt	cd59uva48 mutant
3	wt	61	19.0625		SC	Schwann cell
4	wt	58	18.125
5	wt	57	17.8125
6	wt	53	16.5625
7	wt	68	21.25
8	wt	58	18.125
9	wt	53	16.5625
10	wt	61	19.0625
11	wt	53	16.5625
1	mt	77	24.0625
2	mt	77	24.0625
3	mt	74	23.125
4	mt	83	25.9375
5	mt	76	23.75
6	mt	91	28.4375
7	mt	73	22.8125
8	mt	65	20.3125
9	mt	91	28.4375
10	mt	81	25.3125
