# Supplementary material for: Cd59 and inflammation regulate Schwann cell development
Source: eLife. 2022 Jun 24;11:e76640. doi: 10.7554/eLife.76640 (PMC9232220; doi:10.7554/eLife.76640)
Supplement: Figure 4—source data 4. — Data contributed to scatter plot of the number of Sox10-positive SCs along the pLLN at 7 dpf (mean ± SEM: WT: 27.0 ± 0.6, cd59uva48: 33.9 ± 0.8; p-value: p<0.0001; data point = 1 fish). These data were compared with Student’s t-test using GraphPad Prism. Data were collected from somites 11–13 (~320 µm) and normalized to units per 100 µm. [file elife-76640-fig4-data4.xlsx]

## Sheet: Sheet1
Source Data for Figure 4E
Fish	Genotype	Total Number of SCs	Number of SCs per 100 µm		Notes
1	wt	86	26.875		wt	wildtype
2	wt	86	26.875		mt	cd59uva48 mutant
3	wt	100	31.25		SC	Schwann cell
4	wt	89	27.8125
5	wt	95	29.6875
6	wt	87	27.1875
7	wt	83	25.9375
8	wt	89	27.8125
9	wt	76	23.75
10	wt	81	25.3125
11	wt	87	27.1875
12	wt	80	25
1	mt	114	35.625
2	mt	104	32.5
3	mt	103	32.1875
4	mt	105	32.8125
5	mt	109	34.0625
6	mt	124	38.75
7	mt	99	30.9375
8	mt	109	34.0625
9	mt	119	37.1875
10	mt	97	30.3125
11	mt	110	34.375
