# Supplementary material for: Cd59 and inflammation regulate Schwann cell development
Source: eLife. 2022 Jun 24;11:e76640. doi: 10.7554/eLife.76640 (PMC9232220; doi:10.7554/eLife.76640)
Supplement: Figure 4—source data 5. — Data contributed to scatter plot of the number of EdU-positive SCs along the pLLN at 55 hpf (mean ± SEM: WT: 6.7 ± 0.5, cd59uva48: 13.6 ± 0.5; p<0.0001; dot = 1 fish). These data were compared with Student’s t-test using GraphPad Prism. Data were collected from somites 11–13 (~320 µm) and normalized to units per 100 µm. [file elife-76640-fig4-data5.xlsx]

## Sheet: Sheet1
Source Data for Figure 4G
Fish	Genotype	Number of EdU+ Sox10+ SCs	Number of EdU+ Sox10+ SCs per 100 µm		Notes
1	WT	26	8.125		WT	wildtype
2	WT	25	7.8125		MT	cd59uva48 mutant
3	WT	14	4.375		SC	Schwann cell
4	WT	28	8.75
5	WT	35	10.9375
6	WT	26	8.125
7	WT	32	10
8	WT	31	9.6875
9	WT	17	5.3125
10	WT	19	5.9375
11	WT	22	6.875
12	WT	13	4.0625
13	WT	27	8.4375
14	WT	9	2.8125
15	WT	31	9.6875
16	WT	24	7.5
17	WT	11	3.4375
18	WT	15	4.6875
19	WT	9	2.8125
20	WT	27	8.4375
21	WT	16	5
22	WT	18	5.625
23	WT	11	3.4375
24	WT	28	8.75
25	WT	9	2.8125
26	WT	33	10.3125
27	WT	11	3.4375
28	WT	32	10
1	MT	29	9.0625
2	MT	40	12.5
3	MT	46	14.375
4	MT	40	12.5
5	MT	56	17.5
6	MT	53	16.5625
7	MT	45	14.0625
8	MT	57	17.8125
9	MT	47	14.6875
10	MT	58	18.125
11	MT	37	11.5625
12	MT	45	14.0625
13	MT	40	12.5
14	MT	44	13.75
15	MT	60	18.75
16	MT	32	10
17	MT	45	14.0625
18	MT	48	15
19	MT	42	13.125
20	MT	42	13.125
21	MT	47	14.6875
22	MT	42	13.125
23	MT	42	13.125
24	MT	44	13.75
25	MT	25	7.8125
26	MT	38	11.875
27	MT	41	12.8125
28	MT	33	10.3125
