# Supplementary material for: Cd59 and inflammation regulate Schwann cell development
Source: eLife. 2022 Jun 24;11:e76640. doi: 10.7554/eLife.76640 (PMC9232220; doi:10.7554/eLife.76640)
Supplement: Figure 4—source data 6. — Data contributed to scatter plot of the number of mitotic events observed in Schwann cells (SCs) from 48 to 55 hpf (mean ± SEM: WT: 0.6 ± 0.1, cd59uva48: 1.7 ± 0.3; p=0.0019; data point = 1 fish). These data were compared with Student’s t-test using GraphPad Prism. Data were collected from somites 11–13 (~320 µm) and normalized to units per 100 µm. [file elife-76640-fig4-data6.xlsx]

## Sheet: 48 to 55 hpf
Source Data for Figure 4H
Fish	Genotype	Total Number of Mitotic Events	Length of Nerve	Total Number of Mitotic Events per 100 µm		Notes
1	wildtype	5	320	1.5625		mutant	cd59uva48 mutant
2	wildtype	3	320	0.9375
3	wildtype	1	320	0.3125
4	wildtype	1	320	0.3125
5	wildtype	0	320	0
6	wildtype	1	320	0.3125
7	wildtype	1	320	0.3125
8	wildtype	2	320	0.625
9	wildtype	2	320	0.625
10	wildtype	2	320	0.625
1	mutant	2	320	0.625
2	mutant	5	243	2.05761
3	mutant	8	320	2.5
4	mutant	6	320	1.875
5	mutant	11	320	3.4375
6	mutant	3	320	0.9375
7	mutant	2	320	0.625
8	mutant	5	320	1.5625
9	mutant	5	320	1.5625
10	mutant	5	320	1.5625
