# Supplementary material for: Cd59 and inflammation regulate Schwann cell development
Source: eLife. 2022 Jun 24;11:e76640. doi: 10.7554/eLife.76640 (PMC9232220; doi:10.7554/eLife.76640)
Supplement: Figure 4—source data 7. — Data contributed to scatter plot of the number of mitotic events observed in Schwann cells (SCs) from 54 to 75 hpf (mean ± SEM: WT: 4.1 ± 0.3, cd59uva48: 4.1 ± 0.4; data point = 1 fish). These data were compared with Student’s t-test using GraphPad Prism. Data were collected from somites 11–13 (~320 µm) and normalized to units per 100 µm. [file elife-76640-fig4-data7.xlsx]

## Sheet: Sheet1
Source Data for Figure 4I
Fish	Genotype	Total Number of Mitotic Events	Length of Nerve	Total Number of Mitotic Events per 100 µm		Notes
1	wildtype	18	320	5.625		mutant	cd59uva48 mutant
2	wildtype	12	320	3.75
3	wildtype	13	320	4.0625
4	wildtype	10	320	3.125
5	wildtype	6	320	1.875
6	wildtype	7	320	2.1875
7	wildtype	10	320	3.125
8	wildtype	16	320	5
9	wildtype	19	320	5.9375
10	wildtype	9	320	2.8125
11	wildtype	16	320	5
12	wildtype	16	320	5
13	wildtype	8	298	2.68456
14	wildtype	12	320	3.75
15	wildtype	16	320	5
16	wildtype	21	320	6.5625
1	mutant	10	320	3.125
2	mutant	11	320	3.4375
3	mutant	10	320	3.125
4	mutant	17	320	5.3125
5	mutant	7	245	2.85714
6	mutant	21	320	6.5625
7	mutant	5	253	1.97628
8	mutant	16	320	5
9	mutant	15	320	4.6875
10	mutant	13	*	4.47715	*length of nerve adjusted for video drift, noted in E10 formula
11	mutant	11	320	3.4375
12	mutant	15	320	4.6875
