# Supplementary material for: Cd59 and inflammation regulate Schwann cell development
Source: eLife. 2022 Jun 24;11:e76640. doi: 10.7554/eLife.76640 (PMC9232220; doi:10.7554/eLife.76640)
Supplement: Figure 4—source data 8. — Data contributed to scatter plot of the time of final cell division (hpf) observed in SCs from 54 to 75 hpf (mean ± SEM: WT: 69.1 ± 1.1, cd59uva48: 68.4 ± 0.9; data point = 1 fish). These data were compared with Student’s t-test using GraphPad Prism. Data were collected from somites 11–13 (~320 µm). [file elife-76640-fig4-data8.xlsx]

## Sheet: Sheet1
Source Data for Figure 4J
Fish	Genotype	Frame of Last Division	Time of Final Division (hpf)		Notes
1	wildtype	83	67.8333		mutant	cd59uva48 mutant
2	wildtype	74	66.3333		hpf	hours post fertilization
3	wildtype	114	73
4	wildtype	76	66.6667
5	wildtype	57	63.5
6	wildtype	84	68
7	wildtype	105	71.5
8	wildtype	60	64
9	wildtype	78	67
10	wildtype	49	62.1667
11	wildtype	108	72
12	wildtype	72	66
13	wildtype	111	72.5
14	wildtype	36	60
15	wildtype	105	71.5
16	wildtype	119	73.8333
1	mutant	76	66.6667
2	mutant	100	70.6667
3	mutant	95	69.8333
4	mutant	126	75
5	mutant	77	66.8333
6	mutant	81	67.5
7	mutant	81	67.5
8	mutant	99	70.5
9	mutant	126	75
10	mutant	95	69.8333
11	mutant	87	68.5
12	mutant	117	73.5
