# Supplementary material for: Cd59 and inflammation regulate Schwann cell development
Source: eLife. 2022 Jun 24;11:e76640. doi: 10.7554/eLife.76640 (PMC9232220; doi:10.7554/eLife.76640)
Supplement: Figure 5—figure supplement 1—source data 1. — Data contributed to scatter plot of the length of myelin sheaths (µm) along the posterior lateral line nerve (pLLN) at 7 days post fertilization (dpf) (mean ± SEM: WT: 66.3 ± 2.4, cd59uva48: 63.4 ± 4.6; data point = 1 myelin sheath; n = 6–7 fish per group). These data were compared with Student’s t-test using GraphPad Prism. [file elife-76640-fig5-figsupp1-data1.xlsx]

## Sheet: Sheet1
Source Data for Figure 5 - Figure Supplement 1E
Fish	Cell	Genotype	Myelin Length (µm)		Notes
1	1	WT	60.999		WT	wildtype
1	2	WT	55.772		MT	cd59uva48 mutant
2	3	WT	81.137
2	4	WT	61.938
2	5	WT	97.664
2	6	WT	63.386
2	7	WT	62.401
2	8	WT	42.386
2	9	WT	46.657
2	10	WT	86.516
2	11	WT	63.281
2	12	WT	76.838
2	13	WT	88.611
2	14	WT	51.495
2	15	WT	64.159
2	16	WT	44.941
2	17	WT	59.349
3	18	WT	67.731
3	19	WT	72.952
3	20	WT	62.664
3	21	WT	85.509
3	22	WT	44.385
3	23	WT	63.32
3	24	WT	75.094
3	25	WT	83.271
3	26	WT	60.402
3	27	WT	77.261
3	28	WT	86.72
3	29	WT	62.253
3	30	WT	44.093
3	31	WT	38.417
5	32	WT	54.969
5	33	WT	84.933
5	34	WT	66.756
5	35	WT	60.616
6	36	WT	46.089
6	37	WT	70.239
6	38	WT	69.64
7	39	WT	69.573
7	40	WT	96.793
2	1	MT	70.136
2	2	MT	51.172
2	3	MT	63.099
2	4	MT	86.719
2	5	MT	70.177
2	6	MT	83.517
2	7	MT	96.805
2	8	MT	139.327
8	9	MT	71.682
8	10	MT	91.943
7	11	MT	53.487
7	12	MT	55.718
6	13	MT	69.136
5	14	MT	54.208
4	15	MT	61.512
4	16	MT	60.878
4	17	MT	66.36
4	18	MT	66.51
4	19	MT	69.519
4	20	MT	38.105
4	21	MT	105.892
4	22	MT	65.071
4	23	MT	71.416
3	24	MT	40.292
