# Supplementary material for: Cd59 and inflammation regulate Schwann cell development
Source: eLife. 2022 Jun 24;11:e76640. doi: 10.7554/eLife.76640 (PMC9232220; doi:10.7554/eLife.76640)
Supplement: Figure 5—figure supplement 1—source data 2. — Data contributed to scatter plot of the myelinated nerve volumes (µm3) along the posterior lateral line nerve (pLLN) at 7 days post fertilization (dpf) (mean ± SEM: WT: 5.3 ± 0.3, cd59uva48: 3.3 ± 0.2; p<0.0001; data point = 1 fish). These data were compared with Student’s t-test using GraphPad Prism. Data were collected from somite 12 (~110 µm). All data were normalized to units per 100 µm. [file elife-76640-fig5-figsupp1-data2.xlsx]

## Sheet: Sheet1
Source Data for Figure 5 - Figure Supplement 1F
Fish	Genotype	Total Myelinated Nerve Volume (µm3)	Myelinated Nerve Volume (µm3) per 100 µm	Myelinated Nerve Volume (k, µm3) per 100 µm		Notes
1	wt	4503	4056.76	4.05676		wt	wildtype
2	wt	5083.8	4580	4.58		mt	cd59uva48 mutant
3	wt	5901.98	5317.1	5.3171
4	wt	8628.01	7772.98	7.77298
5	wt	6524.17	5877.63	5.87763
6	wt	4330.56	3901.41	3.90141
7	wt	4440.06	4000.05	4.00005
8	wt	7590.72	6838.49	6.83849
9	wt	7280.89	6559.36	6.55936
10	wt	6941.01	6253.17	6.25317
11	wt	6451.57	5812.23	5.81223
12	wt	3595.69	3239.36	3.23936
13	wt	6550.84	5901.65	5.90165
14	wt	6783.98	6111.69	6.11169
15	wt	4300.96	3874.74	3.87474
16	wt	5897.16	5312.76	5.31276
17	wt	3680.27	3315.56	3.31556
18	wt	7700.32	6937.22	6.93722
19	wt	5387.11	4853.25	4.85325
1	mt	6441.6	5803.24	5.80324
2	mt	2246.92	2024.25	2.02425
3	mt	4273.27	3849.79	3.84979
4	mt	3989.12	3593.8	3.5938
5	mt	3460.55	3117.61	3.11761
6	mt	3040.44	2739.13	2.73913
7	mt	3974.17	3580.33	3.58033
8	mt	2078.47	1872.49	1.87249
9	mt	3675.69	3311.43	3.31143
10	mt	2678.4	2412.97	2.41297
11	mt	3710.11	3342.44	3.34244
12	mt	5481.71	4938.48	4.93848
13	mt	4676.74	4213.28	4.21328
14	mt	1890.54	1703.19	1.70319
15	mt	3562.68	3209.62	3.20962
16	mt	4122.86	3714.29	3.71429
17	mt	2802.08	2524.39	2.52439
18	mt	2946.62	2654.61	2.65461
19	mt	5145.3	4635.41	4.63541
20	mt	3308.76	2980.86	2.98086
