# Supplementary material for: Cd59 and inflammation regulate Schwann cell development
Source: eLife. 2022 Jun 24;11:e76640. doi: 10.7554/eLife.76640 (PMC9232220; doi:10.7554/eLife.76640)
Supplement: Figure 5—figure supplement 1—source data 3. — Data contributed to scatter plot of axon volumes (µm3) along the posterior lateral line nerve (pLLN) at 7 days post fertilization (dpf) (mean ± SEM: WT: 3.3 ± 0.3, cd59uva48: 3.3 ± 0.5; data point = 1 fish). These data were compared with Student’s t-test using GraphPad Prism. Data were collected from somite 12 (~110 µm). All data were normalized to units per 100 µm. [file elife-76640-fig5-figsupp1-data3.xlsx]

## Sheet: Sheet1
Source Data for Figure 5 - Figure Supplement 1G
Fish	Genotype	Total Axon Volume (µm3)	Axon Volume (µm3) per 100 µm	Axon Volume (k, µm3) per 100 µm		Notes
1	wt	4917.51	4470.47	4.47047		wt	wildtype
2	wt	2056.21	1869.28	1.86928		mt	cd59uva48 mutant
3	wt	2836.15	2578.32	2.57832
4	wt	4986.13	4532.85	4.53285
5	wt	2275.78	2068.89	2.06889
6	wt	4460.07	4054.61	4.05461
7	wt	2904.76	2640.69	2.64069
8	wt	2607.43	2370.39	2.37039
9	wt	2378.7	2162.46	2.16246
10	wt	4048.37	3680.34	3.68034
1	mt	3453.7	3139.72	3.13972
2	mt	2515.94	2287.22	2.28722
3	mt	3270.72	2973.38	2.97338
4	mt	2721.79	2474.35	2.47435
5	mt	2813.28	2557.52	2.55752
6	mt	4551.56	4137.78	4.13778
7	mt	1980.73	1800.66	1.80066
8	mt	4551.56	4137.78	4.13778
9	mt	7913.77	7194.33	7.19433
10	mt	2042.48	1856.8	1.8568
