# Supplementary material for: Cd59 and inflammation regulate Schwann cell development
Source: eLife. 2022 Jun 24;11:e76640. doi: 10.7554/eLife.76640 (PMC9232220; doi:10.7554/eLife.76640)
Supplement: Figure 5—figure supplement 1—source data 4. — Data contributed to scatter plot of the number of myelinated axons per pLLN at 7 dpf. Data were collected from three sections per fish separated by 100 µm (mean ± SEM: WT: 16.22 ± 0.6, cd59uva48: 16.67 ± 0.8; data point = 1 section; n = 3 fish per group). These data were compared with Student’s t-test using GraphPad Prism. [file elife-76640-fig5-figsupp1-data4.xlsx]

## Sheet: Sheet1
Source Data for Figure 5 - Figure Supplement 1H
Fish	Section Batch	Genotype	Number of Myelinated Axons per Nerve		Notes
2	1	MT	14		WT	wildtype
2	2	MT	17		MT	cd59uva48 mutant
2	3	MT	17
4	1	MT	22
4	2	MT	16
4	3	MT	16
5	1	MT	17
5	2	MT	17
5	3	MT	14
1	1	WT	18
1	2	WT	17
1	3	WT	14
4	1	WT	19
4	2	WT	14
4	3	WT	16
5	1	WT	16
5	2	WT	16
5	3	WT	16
