# Supplementary material for: Cd59 and inflammation regulate Schwann cell development
Source: eLife. 2022 Jun 24;11:e76640. doi: 10.7554/eLife.76640 (PMC9232220; doi:10.7554/eLife.76640)
Supplement: Figure 5—source data 1. — Data contributed to X-Y plot of the average number of myelin wrappings per fish relative to the average axon area per fish at 7 dpf. Data were collected from three sections per fish separated by 100 µm. Significance was determined by comparing the average number of myelin wraps divided by corresponding the average axon area for each fish with Student’s t-test using GraphPad Prism (average number of myelin wraps per fish mean ± SEM: WT: 3.95 ± 0.19, cd59uva48: 3.27 ± 0.20; average axon area per fish mean ± SEM: WT: 0.51 ± 0.03, cd59uva48: 0.52 ± 0.03; average number of myelin wraps/average axon area per fish mean ± SEM: WT: 0.13 ± 0.01, cd59uva48: 0.16 ± 0.002; p=0.0568; dot = 1 fish). [file elife-76640-fig5-data1.xlsx]

## Sheet: Myelin wraps
Source Data for Figure 5D
			Number of Myelin Wraps per Axon
Fish	Section Batch	Genotype	Axon 1	Axon 2	Axon 3	Axon 4	Axon 5	Axon 6	Axon 7	Axon 8	Axon 9	Axon 10	Axon 11	Axon 12	Axon 13	Axon 14	Axon 15	Axon 16	Axon 17	Axon 18	Axon 19	Axon 20	Axon 21		Average per nerve section	Average per fish
2	1	MT	4	6	4	5	3	8	4	3	3	4													4.4	3.65789
2	2	MT	3	5	7	3	3	2	4	4	4	4	4	3	4	3	4								3.8
2	3	MT	1	2	3	2	5	2	5	6	2	2	3	3	2										2.92308
4	1	MT	3	3	3	4	4	2	3	1	3	1	3	4	1	4	5	4	4	5	5	5	4		3.38095	3.11765
4	2	MT	2	4	2	4	4	3	2	4	2	3	1	2	2	2	2	2							2.5625
4	3	MT	4	4	2	6	4	4	5	3	3	3	2	3	2	2									3.35714
5	1	MT	4	1	2	3	1	2	2	3	3	2	5	6	2	3	2	5							2.875	3.02273
5	2	MT	4	6	3	4	1	3	4	3	5	2	2	2	3	2	3	4	3						3.17647
5	3	MT	3	2	3	3	6	2	4	3	3	3	1												3
1	1	WT	2	5	3	3	3	3	4	6	3	3	4	3	2	2									3.28571	3.575
1	2	WT	4	2	3	3	2	3	6	3	3	3	3	5	5	3	4	4	4						3.52941
1	3	WT	5	4	5	7	6	3	1	3	3														4.11111
4	1	WT	4	4	5	4	4	5	2	3	5														4	4.08333
4	2	WT	5	5	5	3	4	4	4	3	3														4
4	3	WT	6	5	4	3	4	4																	4.33333
5	1	WT	4	5	3	4	4	4	3	3	3	4													3.7	4.17857
5	2	WT	6	3	3	5	3	3	4	4	5														4
5	3	WT	5	4	8	4	4	3	6	4	6														4.88889

## Sheet: Axon area
Source Data for Figure 5D
			Area of Axon Crossection (µm2)
Fish	Section Batch	Genotype	Axon 1	Axon 2	Axon 3	Axon 4	Axon 5	Axon 6	Axon 7	Axon 8	Axon 9	Axon 10	Axon 11	Axon 12	Axon 13		average per section	average per fish
2	1	MT	0.812	0.74	0.652	0.725											0.73225	0.566474
2	2	MT	1.147	0.278	0.507	0.374	0.175	0.26	0.22	0.522	0.087						0.396667
2	3	MT	1.06	0.894	0.803	0.737	0.436	0.334									0.710667
4	1	MT	0.213	0.435	0.471	0.594	0.434	0.583	0.312	0.151	0.318						0.390111	0.504815
4	2	MT	0.857	0.719	0.576	0.537	0.29	0.542	0.552								0.581857
4	3	MT	0.64	0.271	0.643	0.27	0.314	1.361	0.261	0.32	0.266	1.063	0.637				0.549636
5	1	MT	0.184	3.062	1.029	0.731	0.203	0.274	0.435	0.686							0.8255	0.48716
5	2	MT	0.427	0.362	0.118	0.294	0.166	0.154	0.234	0.402	0.239	0.34					0.2736
5	3	MT	0.431	0.536	0.447	0.371	0.593	0.406	0.336	0.238	0.275	0.248					0.3881
1	1	WT	0.875	0.511	0.845	0.538	1.276										0.809	0.541583
1	2	WT	0.751	0.535	0.471	0.327	0.471	0.532	0.402	0.983	0.446	0.538					0.5456
1	3	WT	0.5	0.966	0.189	0.399	0.239	0.184	0.296	0.244	0.48						0.388556
4	1	WT	0.306	1.148	0.946	0.551	0.234	0.389									0.595667	0.478571
4	2	WT	0.442	1.238	0.325	0.151	0.292										0.4896
4	3	WT	0.845	0.377	0.388	0.242	0.167	0.397	0.271	0.679	0.248	0.414					0.4028
5	1	WT	0.587	1.993	1.059	1.129	0.384	1.134									1.04767	0.50237
5	2	WT	0.589	0.363	0.097	0.083	0.553	0.218	0.198	0.219	0.543	0.342	0.688	0.269	0.071		0.325615
5	3	WT	0.368	0.427	0.429	0.375	0.784	0.317	0.272	0.073							0.380625

## Sheet: Graphed Data
Source Data for Figure 5D
Fish	Genotype	Average Number of Myelin Wraps	Average Axon Area (µm2)
2	MT	3.65789	0.566474
4	MT	3.11765	0.504815
5	MT	3.02273	0.48716
1	WT	3.575	0.541583
4	WT	4.08333	0.478571
5	WT	4.17857	0.50237
