# Supplementary material for: Cd59 and inflammation regulate Schwann cell development
Source: eLife. 2022 Jun 24;11:e76640. doi: 10.7554/eLife.76640 (PMC9232220; doi:10.7554/eLife.76640)
Supplement: Figure 5—source data 2. — Data contributed to scatter plot of the number of NaV channel clusters along mbpa:tagrfp-positive pLLN nerves at 7 dpf (mean ± SEM: WT: 17.3 ± 0.7, cd59uva48: 9.9 ± 0.9; p<0.0001; data point = 1 fish). These data were compared with Student’s t-test using GraphPad Prism. Data were collected from somites 3–13 (~320 µm) and normalized to units per 100 µm. [file elife-76640-fig5-data2.xlsx]

## Sheet: Figure 5E
Source Data for Figure 5E
		Number of NaV Clusters
fish	genotype	Image A	Image B	Image C	Total Number of NaV Clusters	Total Number of NaV Clusters per 100 µm
1	wildtype	54	65	66	185	19.2708
2	wildtype	51	55	49	155	16.1458
3	wildtype	37	46	46	129	13.4375
4	wildtype	40	67	65	172	17.9167
5	wildtype	43	49	52	144	15
6	wildtype	63	65	38	166	17.2917
7	wildtype	45	51	58	154	16.0417
8	wildtype	43	49	50	142	14.7917
9	wildtype	39	45	43	127	13.2292
10	wildtype	57	62	69	188	19.5833
11	wildtype	78	63	51	192	20
12	wildtype	61	64	69	194	20.2083
13	wildtype	55	67	55	177	18.4375
14	wildtype	52	75	71	198	20.625
1	cd59uva48 mutant	17	35	27	79	8.22917
2	cd59uva48 mutant	28	33	33	94	9.79167
3	cd59uva48 mutant	3	11	13	27	2.8125
4	cd59uva48 mutant	25	37	47	109	11.3542
5	cd59uva48 mutant	14	13	9	36	3.75
6	cd59uva48 mutant	34	37	31	102	10.625
7	cd59uva48 mutant	45	33	32	110	11.4583
8	cd59uva48 mutant	28	37	22	87	9.0625
9	cd59uva48 mutant	39	38	21	98	10.2083
10	cd59uva48 mutant	44	42	36	122	12.7083
11	cd59uva48 mutant	39	46	38	123	12.8125
12	cd59uva48 mutant	21	49	45	115	11.9792
13	cd59uva48 mutant	51	50	31	132	13.75
