# Supplementary material for: Cd59 and inflammation regulate Schwann cell development
Source: eLife. 2022 Jun 24;11:e76640. doi: 10.7554/eLife.76640 (PMC9232220; doi:10.7554/eLife.76640)
Supplement: Figure 5—source data 3. — Data contributed to scatter plot of the number of NF186 clusters along mbpa:tagrfp-positive pLLN nerves at 7 dpf (mean ± SEM: WT: 24.0 ± 0.7, cd59uva48: 18.2 ± 1.3; p=0.0011; data point = 1 fish). These data were compared with Student’s t-test using GraphPad Prism. Data were collected from somites 3–13 (~320 µm) and normalized to units per 100 µm. [file elife-76640-fig5-data3.xlsx]

## Sheet: Sheet1
Source Data for Figure 5F
		Number of NF186 Clusters
Fish	Genotype	A	B	C	Total Number of NF186 Clusters	Total Number of NF186 Clusters per 100 µm		Notes
1	wt	73	88	70	231	24.0625		wt	wildtype
2	wt	58	94	86	238	24.7917		mt	cd59uva48 mutant
3	wt	81	92	88	261	27.1875		NF186	neurofascin 186
4	wt	73	84	49	206	22.1983
5	wt	52	80	67	199	21.5601
6	wt	71	82	77	230	25.3025
7	wt	65	72	89	226	24.8625
8	wt	47	87	79	213	22.1875
9	wt	85	100	86	271	28.2292
10	wt	53	61	76	190	20.9021
11	wt	66	72	69	207	22.7723
1	mt	50	82	83	215	23.6524
2	mt	69	68	73	210	22.6537
3	mt	70	79	91	240	25
4	mt	77	84	52	213	23.1774
5	mt	38	45	52	135	15.1856
6	mt	53	76	39	168	17.5
7	mt	48	78	51	177	18.4375
8	mt	21	23	81	125	13.1027
9	mt	36	38	27	101	11.0624
10	mt	41	62	72	175	18.6567
11	mt	24	49	58	131	13.8918
12	mt	32	54	72	158	16.4583
