# Supplementary material for: Cd59 and inflammation regulate Schwann cell development
Source: eLife. 2022 Jun 24;11:e76640. doi: 10.7554/eLife.76640 (PMC9232220; doi:10.7554/eLife.76640)
Supplement: Figure 6—source data 1. — Data contributed to scatter plot of the number of MACs in SC membranes at 55 hpf (mean ± SEM: WT: 3.3 ± 0.3, cd59uva48: 11.6 ± 1.9; p<0.0001; data point = 1 fish). These data were compared with Student’s t-test using GraphPad Prism. Data were collected from somites 11–13 (~320 µm) and normalized to units per 100 µm. [file elife-76640-fig6-data1.xlsx]

## Sheet: Sheet1
Source Data for Figure 6C
Fish	Genotype	Number of SC-associated MACs	Number of SC-associated MACs per 100 µm		Notes
1	wt	9	2.8125		wt	wildtype
2	wt	13	4.0625		mt	cd59uva48 mutant
3	wt	4	1.25		SC	Schwann cell
4	wt	8	2.5		MAC	membrane attack complex
5	wt	9	2.8125
6	wt	11	3.4375
7	wt	10	3.125
8	wt	19	5.9375
9	wt	12	3.75
10	wt	10	3.125
11	wt	16	5
12	wt	12	3.75
13	wt	3	0.9375
14	wt	16	5
15	wt	11	3.4375
16	wt	13	4.0625
17	wt	5	1.5625
18	wt	7	2.1875
1	mt	11	3.4375
2	mt	31	9.6875
3	mt	24	7.5
4	mt	33	10.3125
5	mt	41	12.8125
6	mt	60	18.75
7	mt	28	8.75
8	mt	68	21.25
9	mt	70	21.875
10	mt	19	5.9375
11	mt	24	7.5
