# Supplementary material for: Cd59 and inflammation regulate Schwann cell development
Source: eLife. 2022 Jun 24;11:e76640. doi: 10.7554/eLife.76640 (PMC9232220; doi:10.7554/eLife.76640)
Supplement: Figure 7—source data 1. — Data contributed to scatter plot of the number of pLLN SCs at 55 hpf (mean ± SEM: DMSO: WT: 12.0 ± 0.5, cd59uva48: 18.1 ± 0.6; Dex: WT: 10.4 ± 0.4, cd59uva48: 13.4 ± 0.6; p-values: WT DMSO vs. cd59uva48 DMSO: p<0.0001, WT Dex vs. cd59uva48 DMSO: p<0.0001, WT Dex vs. cd59uva48 Dex: p=0.0014, cd59uva48 DMSO vs. cd59uva48 Dex: p<0.0001; t-test p-value (compared WT only): WT DMSO vs. WT Dex: p=0.0206; dot = 1 fish). All groups were compared with a two-way ANOVA with Tukey’s post-hoc test using GraphPad Prism. WT DMSO and WT Dex were also compared alone with Student’s t-test using GraphPad Prism. Asterisks (*) indicate significant differences discovered with two-way ANOVA with Tukey’s post-hoc test. Obelisk (†) indicates the significant difference discovered with Student’s t-test comparing WT DMSO and WT Dex alone. Data were collected from somites 11–13 (~320 µm) and normalized to units per 100 µm. [file elife-76640-fig7-data1.xlsx]

## Sheet: Sheet1
Source Data for Figure 6C
Fish	Genotype	Treatment	Number of SCs	Number of SCs per 100 µm
1	wildtype	1% DMSO	36	11.25
2	wildtype	1% DMSO	44	13.75
3	wildtype	1% DMSO	33	10.3125
4	wildtype	1% DMSO	45	14.0625
5	wildtype	1% DMSO	42	13.125
6	wildtype	1% DMSO	40	12.5
7	wildtype	1% DMSO	35	10.9375
8	wildtype	1% DMSO	42	13.125
9	wildtype	1% DMSO	45	14.0625
10	wildtype	1% DMSO	47	14.6875
11	wildtype	1% DMSO	32	10
12	wildtype	1% DMSO	38	11.875
13	wildtype	1% DMSO	21	6.5625
14	wildtype	1% DMSO	38	11.875
15	wildtype	1% DMSO	38	11.875
1	wildtype	1% DMSO + 100 uM Dexamethasone	36	11.25
2	wildtype	1% DMSO + 100 uM Dexamethasone	32	10
3	wildtype	1% DMSO + 100 uM Dexamethasone	35	10.9375
4	wildtype	1% DMSO + 100 uM Dexamethasone	37	11.5625
5	wildtype	1% DMSO + 100 uM Dexamethasone	36	11.25
6	wildtype	1% DMSO + 100 uM Dexamethasone	36	11.25
7	wildtype	1% DMSO + 100 uM Dexamethasone	38	11.875
8	wildtype	1% DMSO + 100 uM Dexamethasone	33	10.3125
9	wildtype	1% DMSO + 100 uM Dexamethasone	28	8.75
10	wildtype	1% DMSO + 100 uM Dexamethasone	23	7.1875
11	wildtype	1% DMSO + 100 uM Dexamethasone	44	13.75
12	wildtype	1% DMSO + 100 uM Dexamethasone	30	9.375
13	wildtype	1% DMSO + 100 uM Dexamethasone	33	10.3125
14	wildtype	1% DMSO + 100 uM Dexamethasone	31	9.6875
15	wildtype	1% DMSO + 100 uM Dexamethasone	34	10.625
16	wildtype	1% DMSO + 100 uM Dexamethasone	36	11.25
17	wildtype	1% DMSO + 100 uM Dexamethasone	34	10.625
18	wildtype	1% DMSO + 100 uM Dexamethasone	38	11.875
19	wildtype	1% DMSO + 100 uM Dexamethasone	21	6.5625
1	cd59uva48 mutant	1% DMSO	50	15.625
2	cd59uva48 mutant	1% DMSO	64	20
3	cd59uva48 mutant	1% DMSO	60	18.75
4	cd59uva48 mutant	1% DMSO	78	24.375
5	cd59uva48 mutant	1% DMSO	48	15
6	cd59uva48 mutant	1% DMSO	56	17.5
7	cd59uva48 mutant	1% DMSO	68	21.25
8	cd59uva48 mutant	1% DMSO	61	19.0625
9	cd59uva48 mutant	1% DMSO	56	17.5
10	cd59uva48 mutant	1% DMSO	72	22.5
11	cd59uva48 mutant	1% DMSO	48	15
12	cd59uva48 mutant	1% DMSO	53	16.5625
13	cd59uva48 mutant	1% DMSO	52	16.25
14	cd59uva48 mutant	1% DMSO	58	18.125
15	cd59uva48 mutant	1% DMSO	54	16.875
16	cd59uva48 mutant	1% DMSO	63	19.6875
17	cd59uva48 mutant	1% DMSO	53	16.5625
1	cd59uva48 mutant	1% DMSO + 100 uM Dexamethasone	47	14.6875
2	cd59uva48 mutant	1% DMSO + 100 uM Dexamethasone	55	17.1875
3	cd59uva48 mutant	1% DMSO + 100 uM Dexamethasone	45	14.0625
4	cd59uva48 mutant	1% DMSO + 100 uM Dexamethasone	41	12.8125
5	cd59uva48 mutant	1% DMSO + 100 uM Dexamethasone	39	12.1875
6	cd59uva48 mutant	1% DMSO + 100 uM Dexamethasone	59	18.4375
7	cd59uva48 mutant	1% DMSO + 100 uM Dexamethasone	46	14.375
8	cd59uva48 mutant	1% DMSO + 100 uM Dexamethasone	50	15.625
9	cd59uva48 mutant	1% DMSO + 100 uM Dexamethasone	45	14.0625
10	cd59uva48 mutant	1% DMSO + 100 uM Dexamethasone	45	14.0625
11	cd59uva48 mutant	1% DMSO + 100 uM Dexamethasone	46	14.375
12	cd59uva48 mutant	1% DMSO + 100 uM Dexamethasone	33	10.3125
13	cd59uva48 mutant	1% DMSO + 100 uM Dexamethasone	34	10.625
14	cd59uva48 mutant	1% DMSO + 100 uM Dexamethasone	29	9.0625
15	cd59uva48 mutant	1% DMSO + 100 uM Dexamethasone	31	9.6875
16	cd59uva48 mutant	1% DMSO + 100 uM Dexamethasone	35	10.9375
17	cd59uva48 mutant	1% DMSO + 100 uM Dexamethasone	48	15
