# Supplementary material for: Cd59 and inflammation regulate Schwann cell development
Source: eLife. 2022 Jun 24;11:e76640. doi: 10.7554/eLife.76640 (PMC9232220; doi:10.7554/eLife.76640)
Supplement: Figure 7—source data 2. — Data contributed to scatter plot of the number of EdU-positive SCs at 55 hpf (mean ± SEM: DMSO: WT: 4.6 ± 0.85, cd59uva48: 9.0 ± 0.68; Dex: WT: 2.7 ± 0.65, cd59uva48: 3.5 ± 0.53; p-values: WT DMSO vs. WT Dex: p=0.0091, WT DMSO vs. cd59uva48 DMSO: p=0.0266, WT Dex vs. cd59uva48 DMSO: p<0.0001, cd59uva48 DMSO vs. cd59uva48 Dex: p<0.0001; dot = 1 fish). Data were compared with a two-way ANOVA with Tukey’s post-hoc test using GraphPad Prism. Data were collected from somites 11–13 (~320 µm) and normalized to units per 100 µm. [file elife-76640-fig7-data2.xlsx]

## Sheet: Sheet1
Source Data for Figure 6D
Fish	Genotype	Treatment	Number of EdU-positive SCs	Number of EdU-positive SCs per 100 µm
1	wildtype	1% DMSO	3	0.9375
2	wildtype	1% DMSO	15	4.6875
3	wildtype	1% DMSO	9	2.8125
4	wildtype	1% DMSO	12	3.75
5	wildtype	1% DMSO	20	6.25
6	wildtype	1% DMSO	21	6.5625
7	wildtype	1% DMSO	23	7.1875
1	wildtype	1% DMSO + 100 uM Dexamethasone	3	0.9375
2	wildtype	1% DMSO + 100 uM Dexamethasone	14	4.375
3	wildtype	1% DMSO + 100 uM Dexamethasone	3	0.9375
4	wildtype	1% DMSO + 100 uM Dexamethasone	8	2.5
5	wildtype	1% DMSO + 100 uM Dexamethasone	12	3.75
6	wildtype	1% DMSO + 100 uM Dexamethasone	0	0
7	wildtype	1% DMSO + 100 uM Dexamethasone	2	0.625
8	wildtype	1% DMSO + 100 uM Dexamethasone	11	3.4375
9	wildtype	1% DMSO + 100 uM Dexamethasone	12	3.75
10	wildtype	1% DMSO + 100 uM Dexamethasone	21	6.5625
1	cd59uva48 mutant	1% DMSO	30	9.375
2	cd59uva48 mutant	1% DMSO	24	7.5
3	cd59uva48 mutant	1% DMSO	20	6.25
4	cd59uva48 mutant	1% DMSO	22	6.875
5	cd59uva48 mutant	1% DMSO	26	8.125
6	cd59uva48 mutant	1% DMSO	38	11.875
7	cd59uva48 mutant	1% DMSO	16	5
8	cd59uva48 mutant	1% DMSO	50	15.625
9	cd59uva48 mutant	1% DMSO	19	5.9375
10	cd59uva48 mutant	1% DMSO	38	11.875
11	cd59uva48 mutant	1% DMSO	26	8.125
12	cd59uva48 mutant	1% DMSO	31	9.6875
13	cd59uva48 mutant	1% DMSO	42	13.125
14	cd59uva48 mutant	1% DMSO	31	9.6875
15	cd59uva48 mutant	1% DMSO	19	5.9375
16	cd59uva48 mutant	1% DMSO	19	5.9375
17	cd59uva48 mutant	1% DMSO	34	10.625
18	cd59uva48 mutant	1% DMSO	33	10.3125
1	cd59uva48 mutant	1% DMSO + 100 uM Dexamethasone	16	5
2	cd59uva48 mutant	1% DMSO + 100 uM Dexamethasone	11	3.4375
3	cd59uva48 mutant	1% DMSO + 100 uM Dexamethasone	14	4.375
4	cd59uva48 mutant	1% DMSO + 100 uM Dexamethasone	9	2.8125
5	cd59uva48 mutant	1% DMSO + 100 uM Dexamethasone	11	3.4375
6	cd59uva48 mutant	1% DMSO + 100 uM Dexamethasone	0	0
7	cd59uva48 mutant	1% DMSO + 100 uM Dexamethasone	15	4.6875
8	cd59uva48 mutant	1% DMSO + 100 uM Dexamethasone	5	1.5625
9	cd59uva48 mutant	1% DMSO + 100 uM Dexamethasone	18	5.625
10	cd59uva48 mutant	1% DMSO + 100 uM Dexamethasone	13	4.0625
