# Supplementary material for: Cd59 and inflammation regulate Schwann cell development
Source: eLife. 2022 Jun 24;11:e76640. doi: 10.7554/eLife.76640 (PMC9232220; doi:10.7554/eLife.76640)
Supplement: Figure 8—figure supplement 1—source data 1. — Data contributed to scatter plot of the number of pLLN SCs at 7 hours post fertilization (hpf) (mean ± SEM: DMSO: 31.9 ± 1.1, Dex: 24.0 ± 0.4; p<0.0001; data point = 1 fish). These data were compared with Student’s t-test using GraphPad Prism. Data were collected from somites 3–13 (~320 µm) and normalized to units per 100 µm. [file elife-76640-fig8-figsupp1-data1.xlsx]

## Sheet: Sheet1
Source Data for Figure 7 - Figure Supplement 1B
Fish	Genotype	Treatment	Number of SCs	Number of SCs per 100 µm		Notes
1	mt	DMSO	109	34.0625		mt	cd59uva48 mutant
2	mt	DMSO	110	34.375		DMSO	1% DMSO in PTU egg water
3	mt	DMSO	87	27.1875		Dex	100 µM dexamethasone plus 1% DMSO in PTU egg water
4	mt	DMSO	104	32.5
5	mt	DMSO	91	28.4375
6	mt	DMSO	111	34.6875
7	mt	DMSO	95	29.6875
8	mt	DMSO	110	34.375
1	mt	Dex	80	25
2	mt	Dex	83	25.9375
3	mt	Dex	76	23.75
4	mt	Dex	73	22.8125
5	mt	Dex	76	23.75
6	mt	Dex	74	23.125
7	mt	Dex	85	26.5625
8	mt	Dex	74	23.125
9	mt	Dex	74	23.125
10	mt	Dex	74	23.125
