# Supplementary material for: Cd59 and inflammation regulate Schwann cell development
Source: eLife. 2022 Jun 24;11:e76640. doi: 10.7554/eLife.76640 (PMC9232220; doi:10.7554/eLife.76640)
Supplement: Figure 8—source data 1. — Data contributed to scatter plot of the number of NaV channel clusters along mbpa:tagrfp-caax-positive nerves at 7 days post fertilization (dpf) (mean ± SEM: DMSO: WT: 26.0 ± 0.8, cd59uva48: 18.6 ± 0.6; Dex: WT: 23.9 ± 0.8, cd59uva48: 28.9 ± 0.8; p-values: WT DMSO vs. cd59uva48 DMSO: p<0.0001, WT Dex vs. cd59uva48 DMSO: p=0.0001, WT Dex vs. cd59uva48 Dex: p=0.0001, cd59uva48 DMSO vs. cd59uva48 Dex: p<0.0001; data point = 1 fish). These data were compared with a two-way ANOVA with Tukey’s post-hoc test using GraphPad Prism. Data were collected from somites 3–13 (~320 µm). All data were normalized to units per 100 µm. [file elife-76640-fig8-data1.xlsx]

## Sheet: Node of Ranvier
Source Data for Figure 7C
			Number of NaV Clusters
Fish	Genotype	Treatment	Image A	Image B	Image C	Total Number of NaV Clusters	Total Number of NaV Clusters per 100 µm		Notes
1	wt	DMSO	86	117	71	274	28.5417		DMSO	1% DMSO in PTU egg water
2	wt	DMSO	126	106	58	290	30.2083		Dex	100 µM dexamethasone plus 1% DMSO in PTU egg water
3	wt	DMSO	92	76	76	244	25.4167		wt	wildtype
4	wt	DMSO	95	89	79	263	27.3958		mt	cd59uva48 mutant
5	wt	DMSO	81	87	67	235	24.4792
6	wt	DMSO	97	78	74	249	25.9375
7	wt	DMSO	88	80	66	234	24.375
8	wt	DMSO	108	67	62	237	24.6875
9	wt	DMSO	85	72	60	217	22.6042
1	wt	Dex	100	68	63	231	24.0625
2	wt	Dex	88	69	59	216	22.5
3	wt	Dex	92	73	60	225	23.4375
4	wt	Dex	98	75	60	233	24.2708
5	wt	Dex	95	86	80	261	27.1875
6	wt	Dex	77	94	64	235	24.4792
7	wt	Dex	84	82	60	226	23.5417
8	wt	Dex	78	74	62	214	22.2917
9	wt	Dex	110	79	86	275	28.6458
10	wt	Dex	99	81	70	250	26.0417
11	wt	Dex	60	45	57	162	16.875
12	wt	Dex	75	86	60	221	23.0208
1	mt	DMSO	66	40	42	148	15.4167
2	mt	DMSO	65	63	43	171	17.8125
3	mt	DMSO	61	43	46	150	15.625
4	mt	DMSO	57	76	66	199	20.7292
5	mt	DMSO	65	68	65	198	20.625
6	mt	DMSO	54	59	56	169	17.6042
7	mt	DMSO	56	46	50	152	15.8333
8	mt	DMSO	84	75	54	213	22.1875
9	mt	DMSO	65	66	49	180	18.75
10	mt	DMSO	68	69	53	190	19.7917
11	mt	DMSO	74	62	49	185	19.2708
12	mt	DMSO	62	78	48	188	19.5833
1	mt	Dex	85	80	50	215	22.3958
2	mt	Dex	94	96	61	251	26.1458
3	mt	Dex	66	90	86	242	25.2083
4	mt	Dex	79	101	77	257	26.7708
5	mt	Dex	109	95	86	290	30.2083
6	mt	Dex	117	92	75	284	29.5833
7	mt	Dex	99	81	61	241	25.1042
8	mt	Dex	93	115	90	298	31.0417
9	mt	Dex	104	111	86	301	31.3542
10	mt	Dex	88	105	86	279	29.0625
11	mt	Dex	103	111	93	307	31.9792
12	mt	Dex	116	73	87	276	28.75
13	mt	Dex	122	100	82	304	31.6667
14	mt	Dex	113	114	87	314	32.7083
15	mt	Dex	108	112	88	308	32.0833
