# Supplementary material for: Cd59 and inflammation regulate Schwann cell development
Source: eLife. 2022 Jun 24;11:e76640. doi: 10.7554/eLife.76640 (PMC9232220; doi:10.7554/eLife.76640)
Supplement: Figure 8—source data 2. — Data contributed to scatter plot of myelinated nerve volumes at 7 days post fertilization (dpf) (mean ± SEM: DMSO: WT: 5.6 ± 0.4, cd59uva48: 4.1 ± 0.2; Dex: WT: 4.9 ± 0.1, cd59uva48: 5.4 ± 0.2; p-values: WT DMSO vs. cd59uva48 DMSO: p=0.0009, cd59uva48 DMSO vs. cd59uva48 Dex: p=0.0006; data point = 1 fish). These data were compared with a two-way ANOVA with Tukey’s post-hoc test using GraphPad Prism. Data were collected from somite 12 (~110 µm). All data were normalized to units per 100 µm. [file elife-76640-fig8-data2.xlsx]

## Sheet: Sheet1
Source Data for Figure 7D
Fish	Genotype	Treatment	Total Myelinated Nerve Volume (µm3)	Myelinated Nerve Volume (µm3) per 100 µm	Myelinated Nerve Volume (k, µm3) per 100 µm		Notes
1	wt	dmso	7798	7025.23	7.02523		dmso	1% DMSO in PTU egg water
2	wt	dmso	5641	5081.98	5.08198		dex	100 µM dexamethasone plus 1% DMSO in PTU egg water
3	wt	dmso	6136	5527.93	5.52793		wt	wildtype
4	wt	dmso	6196	5581.98	5.58198		mt	cd59uva48 mutant
5	wt	dmso	5147	4636.94	4.63694
1	wt	dex	5655	5094.59	5.09459
2	wt	dex	6058	5457.66	5.45766
3	wt	dex	5310	4783.78	4.78378
4	wt	dex	5214	4697.3	4.6973
5	wt	dex	5363	4831.53	4.83153
6	wt	dex	4965	4472.97	4.47297
1	mt	dmso	4712	4245.05	4.24505
2	mt	dmso	4504	4057.66	4.05766
3	mt	dmso	4185	3770.27	3.77027
4	mt	dmso	4717	4249.55	4.24955
5	mt	dmso	4622	4163.96	4.16396
6	mt	dmso	4619	4161.26	4.16126
7	mt	dmso	4069	3665.77	3.66577
8	mt	dmso	4146	3735.14	3.73514
9	mt	dmso	6199	5584.68	5.58468
10	mt	dmso	3573	3218.92	3.21892
1	mt	dex	5505	4959.46	4.95946
2	mt	dex	5773	5200.9	5.2009
3	mt	dex	6445	5806.31	5.80631
4	mt	dex	5887	5303.6	5.3036
5	mt	dex	5316	4789.19	4.78919
6	mt	dex	7050	6351.35	6.35135
7	mt	dex	5524	4976.58	4.97658
8	mt	dex	6532	5884.68	5.88468
